# Supplementary material for: Microbiological Biodiversity of Regional Cow, Goat and Ewe Milk Cheeses Produced in Poland and Antibiotic Resistance of Lactic Acid Bacteria Isolated from Them
Source: MDPI journal article supplement (doi:10.3390/ani13010168), 2022-12-31
Supplement: s1 [file s1]

**Table S3.** Antibiotic resistance gene-specific primers used in the study.

| Gene*         | Primer's name | Sequence (5' – 3')     | T <sub>a</sub> (°C) | Amplicon (bp) | Ref. |
|---------------|---------------|------------------------|---------------------|---------------|------|
| <i>tet(M)</i> | tetMf         | gtggacaaaggtacaacgag   | 62                  | 406           | [29] |
|               | tetMr         | cggtaaagttcgtcacacac   |                     |               |      |
| <i>tet(L)</i> | tetLf         | tggtggaatgatagccatt    | 62                  | 229           | [30] |
|               | tetLr         | caggaatgacagcacgctaa   |                     |               |      |
| <i>tet(W)</i> | tetWf         | gagagcctgctatatgccagc  | 64                  | 168           | [31] |
|               | tetWr         | gggcgtatccacaatgttaac  |                     |               |      |
| <i>erm(B)</i> | ermBf         | catttaacgacgaaactggc   | 55                  | 425           | [32] |
|               | ermBr         | ggaacatctgtggtatggcg   |                     |               |      |
| <i>cat-TC</i> | cat-TCf       | caatagcgacggagagttagg  | 55                  | 384           | [33] |
|               | cat-TCr       | aatcctgcatgataaccatcac |                     |               |      |

\* *tet(M)*, *tet(L)*, *tet(W)* – tetracycline resistant genes, *erm(B)* – erythromycin, *cat-TC* – chloramphenicol.

T<sub>a</sub> – temperature of annealing.
