# Supplementary material for: Microbiological Biodiversity of Regional Cow, Goat and Ewe Milk Cheeses Produced in Poland and Antibiotic Resistance of Lactic Acid Bacteria Isolated from Them
Source: MDPI journal article supplement (doi:10.3390/ani13010168), 2022-12-31
Supplement: s1 [file s1]

**Table S4.** Phenotypic and genotypic resistance of strains isolated from regional cheeses

| Cheese | Isolate symbol | Species identified by PCR            | Phenotypic antibiotic resistance <sup>1</sup> | Genotypic antibiotic resistance <sup>2</sup>  |
|--------|----------------|--------------------------------------|-----------------------------------------------|-----------------------------------------------|
| Os1    | M9             | <i>Lactiplantibacillus pentosus</i>  | TE                                            | <i>cat-TC</i>                                 |
|        | M18            | <i>Lactiplantibacillus pentosus</i>  | TE, C, E                                      | <i>cat-TC</i>                                 |
|        | M22            | <i>Lactobacillus delbrueckii</i>     | C                                             | -                                             |
|        | M27            | <i>Lactiplantibacillus plantarum</i> | TE, C, E                                      | <i>cat-TC</i>                                 |
| Os2    | M28            | <i>Lactiplantibacillus pentosus</i>  | -                                             | <i>cat-TC</i>                                 |
|        | M30            | <i>Lactiplantibacillus plantarum</i> | E, C                                          | <i>erm(B)</i> , <i>cat-TC</i>                 |
|        | M39            | <i>Lactiplantibacillus pentosus</i>  | TE, C, E                                      | <i>cat-TC</i>                                 |
|        | M41            | <i>Lactiplantibacillus plantarum</i> | -                                             | <i>erm(B)</i> , <i>cat-TC</i>                 |
| Os3    | M42            | <i>Lactiplantibacillus plantarum</i> | -                                             | -                                             |
|        | M45            | <i>Lactiplantibacillus pentosus</i>  | TE                                            | <i>cat-TC</i>                                 |
|        | M46            | <i>Lactiplantibacillus plantarum</i> | TE, C                                         | <i>erm(B)</i> , <i>cat-TC</i>                 |
|        | M47            | <i>Lactiplantibacillus pentosus</i>  | TE, C                                         | <i>erm(B)</i> , <i>cat-TC</i>                 |
| Os4    | BFM 7a         | <i>Leuconostoc lactis</i>            | E                                             | <i>tet(M)</i>                                 |
|        | BFM 9b         | <i>Leuconostoc lactis</i>            | E                                             | <i>erm(B)</i>                                 |
|        | BFM 13         | <i>Leuconostoc mesenteroides</i>     | -                                             | <i>tet(M)</i> , <i>erm(B)</i>                 |
| Os5    | BFM 15a        | <i>Leuconostoc lactis</i>            | TE, E                                         | <i>tet(M)</i>                                 |
|        | BFM 16b        | <i>Leuconostoc mesenteroides</i>     | TE                                            | <i>tet(M)</i>                                 |
|        | BFM 19         | <i>Leuconostoc mesenteroides</i>     | TE                                            | <i>tet(M)</i>                                 |
| Os6    | BFM 20         | <i>Leuconostoc lactis</i>            | -                                             | <i>tet(M)</i> , <i>erm(B)</i>                 |
|        | BFM 22         | <i>Lactococcus lactis</i>            | TE, C, E                                      | <i>tet(M)</i>                                 |
|        | BFM 24d        | <i>Lactocaseibacillus casei</i>      | -                                             | -                                             |
| Os7    | BFM 25b        | <i>Leuconostoc mesenteroides</i>     | TE, E                                         | <i>tet(M)</i>                                 |
|        | BFM 26d        | <i>Lactocaseibacillus casei</i>      | E                                             | <i>tet(M)</i> , <i>erm(B)</i> , <i>cat-TC</i> |
|        | BFM 28b        | <i>Lactiplantibacillus plantarum</i> | TE, C                                         | <i>tet(M)</i> , <i>erm(B)</i>                 |
| Os8    | BFM 29a        | <i>Lactiplantibacillus plantarum</i> | TE, C                                         | <i>tet(M)</i> , <i>erm(B)</i> , <i>cat-TC</i> |
|        | BFM 30b        | <i>Lactocaseibacillus casei</i>      | -                                             | <i>tet(M)</i> , <i>erm(B)</i>                 |
|        | BFM 32         | <i>Lactocaseibacillus casei</i>      | -                                             | <i>tet(M)</i> , <i>cat-TC</i>                 |
| Bu1    | BFM 38         | <i>Leuconostoc lactis</i>            | TE, C                                         | <i>tet(M)</i>                                 |
|        | BFM 42a        | <i>Leuconostoc lactis</i>            | -                                             | <i>tet(M)</i>                                 |
|        | BFM 49         | <i>Leuconostoc mesenteroides</i>     | TE                                            | -                                             |
| Br     | B2             | <i>Lactiplantibacillus plantarum</i> | TE                                            | <i>erm(B)</i> , <i>cat-TC</i>                 |
|        | B4             | <i>Lactiplantibacillus plantarum</i> | -                                             | <i>cat-TC</i>                                 |
|        | B5             | <i>Lactocaseibacillus paracasei</i>  | -                                             | <i>erm(B)</i>                                 |
|        | B6             | <i>Lactiplantibacillus plantarum</i> | -                                             | <i>erm(B)</i>                                 |
|        | B7             | <i>Lactocaseibacillus paracasei</i>  | TE, C                                         | <i>erm(B)</i>                                 |
|        | B8             | <i>Lactiplantibacillus plantarum</i> | E                                             | <i>cat-TC</i>                                 |
| Og1    | Lb48           | <i>Levilactobacillus brevis</i>      | -                                             | -                                             |
|        | Lb49           | <i>Lactobacillus delbrueckii</i>     | TE                                            | <i>cat-TC</i>                                 |
|        | Lb50           | <i>Lactiplantibacillus pentosus</i>  | TE                                            | <i>cat-TC</i>                                 |
| Re1    | Lb51           | <i>Lactobacillus helveticus</i>      | -                                             | <i>erm(B)</i>                                 |
|        | Lb52           | <i>Lactiplantibacillus plantarum</i> | TE, C, E                                      | <i>erm(B)</i> , <i>cat-TC</i>                 |
| Re2    | Lb54           | <i>Lactiplantibacillus plantarum</i> | TE, C                                         | <i>cat-TC</i>                                 |
|        | Lb55           | <i>Lactiplantibacillus plantarum</i> | -                                             | <i>erm(B)</i>                                 |
| Re3    | Lb65           | <i>Lactiplantibacillus pentosus</i>  | E                                             | <i>erm(B)</i> , <i>cat-TC</i>                 |
|        | Lb70           | <i>Lactiplantibacillus plantarum</i> | -                                             | <i>cat-TC</i>                                 |
| Sg1    | P11            | <i>Lactococcus lactis</i>            | -                                             | -                                             |
|        | P12            | <i>Leuconostoc lactis</i>            | -                                             | -                                             |
|        | P21            | <i>Leuconostoc lactis</i>            | -                                             | <i>tet(W)</i>                                 |
|        | P22            | <i>Lactococcus garviae</i>           | TE                                            | <i>tet(L)</i> , <i>cat-TC</i>                 |
|        | P23            | <i>Lactococcus lactis</i>            | -                                             | <i>erm(B)</i>                                 |

|     |      |                                      |          |                               |
|-----|------|--------------------------------------|----------|-------------------------------|
| Sg2 | P71  | <i>Lactococcus lactis</i>            | -        | <i>tet(W), tet(L), erm(B)</i> |
|     | P72  | <i>Leuconostoc lactis</i>            | E, C     | <i>erm(B)</i>                 |
|     | P73  | <i>Lactococcus lactis</i>            | C        | <i>erm(B), cat-TC</i>         |
|     | P74  | <i>Leuconostoc lactis</i>            | TE, E, C | -                             |
|     | P75  | <i>Lactococcus lactis</i>            | C        | <i>cat-TC</i>                 |
|     | P76  | <i>Lactococcus lactis</i>            | -        | -                             |
|     | P77  | <i>Leuconostoc lactis</i>            | TE, C    | <i>tet(L)</i>                 |
| Se1 | P82  | <i>Lactiplantibacillus plantarum</i> | -        | <i>erm(B)</i>                 |
|     | P84  | <i>Leuconostoc mesenteroides</i>     | -        | <i>tet(M), erm(B), cat-TC</i> |
|     | P912 | <i>Leuconostoc lactis</i>            | TE       | <i>erm(B)</i>                 |
|     | P921 | <i>Lactobacillus paracasei</i>       | TE       | <i>tet(M), cat-TC</i>         |
|     | P922 | <i>Leuconostoc lactis</i>            | TE, E, C | -                             |
|     | P93  | <i>Leuconostoc lactis</i>            | -        | <i>tet(L), erm(B)</i>         |
|     | P94  | <i>Leuconostoc mesenteroides</i>     | -        | <i>tet(W), tet(L), erm(B)</i> |
|     | P95  | <i>Lactiplantibacillus plantarum</i> | TE, C    | <i>tet(L)</i>                 |
|     | P96  | <i>Lacticaseibacillus paracasei</i>  | TE, E, C | <i>tet(L), cat-TC</i>         |
|     | P97  | <i>Leuconostoc lactis</i>            | TE, C    | <i>cat-TC</i>                 |
| Ch1 | P51  | <i>Leuconostoc mesenteroides</i>     | -        | <i>tet(M), erm(B)</i>         |
|     | P52  | <i>Lactococcus lactis</i>            | TE, E, C | <i>tet(M)</i>                 |
|     | P53  | <i>Lacticaseibacillus casei</i>      | TE       | -                             |
| Tr1 | P32  | <i>Enterococcus faecium</i>          | TE       | <i>cat-TC</i>                 |
|     | P34  | <i>Lactococcus lactis</i>            | C        | -                             |
|     | P35  | <i>Lactococcus lactis</i>            | -        | <i>cat-TC</i>                 |
|     | P42  | <i>Leuconostoc mesenteroides</i>     | -        | <i>cat-TC</i>                 |
|     | P43  | <i>Leuconostoc lactis</i>            | -        | <i>tet(M)</i>                 |
| Tr2 | P102 | <i>Lactiplantibacillus plantarum</i> | -        | <i>cat-TC</i>                 |
|     | P105 | <i>Lactococcus lactis</i>            | -        | -                             |
|     | P106 | <i>Leuconostoc lactis</i>            | TE, E, C | <i>tet(L), erm(B)</i>         |
|     | P107 | <i>Lactobacillus delbrueckii</i>     | -        | <i>tet(M)</i>                 |

Species previously belonging to the *Lactobacillus* genus are: *Limosilactobacillus fermentum* – *Lactobacillus fermentum*, *Lacticaseibacillus casei* – *Lactobacillus casei*, *Lacticaseibacillus paracasei* – *Lactobacillus paracasei*, *Lactiplantibacillus plantarum* – *Lactobacillus plantarum*, *Lactiplantibacillus pentosus* – *Lactobacillus pentosus*, *Levilactobacillus brevis* – *Lactobacillus brevis*, *Limosilactobacillus fermentum* – *Lactobacillus fermentum*.

<sup>1</sup> TE – tetracycline 30 µg, E – erythromycin 15 µg, C – chloramphenicol 30 µg.

<sup>2</sup> Tetracycline-resistance genes: *tet(M)*, *tet(L)*, *tet(W)*; erythromycin-resistance gene: *erm(B)*; chloramphenicol-resistance gene *cat-TC*.
