# Supplementary material for: Microbiological Biodiversity of Regional Cow, Goat and Ewe Milk Cheeses Produced in Poland and Antibiotic Resistance of Lactic Acid Bacteria Isolated from Them
Source: MDPI journal article supplement (doi:10.3390/ani13010168), 2022-12-31
Supplement: s1 [file s1]

**Table S2.** Genus- and species-specific primers used in the study.

| Target                                          | Name                   | Sequence (5'– 3')                                    | Ta (°C) | Amplicon (bp) | Ref.    |
|-------------------------------------------------|------------------------|------------------------------------------------------|---------|---------------|---------|
| <i>Lactobacillus</i>                            | LbLMA1-rev<br>R16-1    | ctcaaaactaaacaaagtttc<br>cttgtagacaccgcccgtca        | 55      | 250           | [15]    |
| <i>L. casei</i>                                 | Y2<br>casei            | cccactgctgctcccgttaggaagt<br>tgcactgagattcgacttaa    | 45      | 290           | [16]    |
| <i>L. paracasei</i>                             | Y2<br>para             | cccactgctgctcccgttaggaagt<br>caccgagattcaacatgg      | 45      | 220           |         |
| <i>L. rhamnosus</i>                             | Y2<br>rham             | cccactgctgctcccgttaggaagt<br>tgcactgtgatttaattttg    | 45      | 220           |         |
| <i>L. brevis</i>                                | Bre-16S.L<br>Bre-ITS.R | gtgagataaccttcgggagt<br>ggtcacttcgtgatcgctcaa        | 62      | 316           | [17]    |
| <i>L. helveticus</i>                            | Hel I<br>Hel II        | gaagtcatggagagtagagata<br>ctcttctcgggtcgcttg         | 62      | 178           | [18]    |
| <i>L. acidophilus</i>                           | 23-10C<br>Laci-1       | cctttccctcacggtagt<br>tgcaaagtggtagcgtaagc           | 68      | 210           | [19]    |
| <i>L. plantarum</i>                             | Lpla-3<br>Lpla-2       | attcatagtctagttggaggt<br>cctgaactgagagaatttga        | 60      | 248           |         |
| <i>L. fermentum</i>                             | Lfer-3<br>Lfer-4       | actaactgactgatctacga<br>ttcactgctcaagtaatcatc        | 60      | 192           |         |
| <i>L. delbrueckii</i>                           | 20A<br>23B             | aattccgtcaactcctcatc<br>tgatccgctgcttcatttca         | 62      | 715           | [20]    |
| <i>L. delbrueckii</i><br><i>ssp. bulgaricus</i> | 34/2<br>37/1           | cgtaactcctcatcaaccggggct<br>cgccgccgggtgaagggtg      | 62      | 678           |         |
| <i>L. pentosus</i>                              | 16<br>Lpe-16           | gctggatcacctcctttc<br>atgaaactattaaattggtac          | 53      | 220           | [21]    |
| <i>Lactococcus</i>                              | 1RL<br>2RR             | tttgagagtttgatcctgg<br>tctacgcatttcaccgcta           | 45      | 680           | [22]    |
| <i>Lc. lactis</i> ssp.<br><i>lactis</i>         | LacF<br>LacreR         | gtacttgtagcagtgat<br>gggatcatcttgagtgat              | 58      | 163           |         |
| <i>Lc. lactis</i> ssp.<br><i>cremoris</i>       | CreF<br>LacreR         | gtgcttgaccgatttgaa<br>gggatcatcttgagtgat             | 58      | 163           |         |
| <i>Leuconostoc</i>                              | LeucA<br>LeucS         | cactttgtctccgaagag<br>aagcactgttgatggga              | 45      | 613           | [24]    |
| <i>Leu. lactis</i>                              | Llac-f<br>Llac-r       | aggcggcttactggacaac<br>cttagacggctccttccat           | 60      | 742           | [23,24] |
| <i>Leu. mesenteroides</i>                       | Lmes-f<br>Lmes-r       | aacttagtgcgatgac<br>agtcgagttacagactacaa             | 60      | 1150          |         |
| <i>Enterococcus</i>                             | En I<br>En II          | tactgaacaaaccattcatgatg<br>aacttcgtcaccaacgcgaac     | 55      | 112           | [26]    |
| <i>Enterococcus</i><br><i>faecium</i>           | EfaecF<br>EfaecR       | tcaagtacagttagctttattag<br>acgattcaaagctaactgaatcagt | 54      | 680           | [25]    |
| <i>Enterococcus</i><br><i>faecalis</i>          | EfecF<br>EfecR         | ttgaggcagaccagattgacg<br>tatgacagcgactccgattcc       | 54      | 941           |         |

Ta – temperature of annealing
