# Supplementary material for: Microbiological Biodiversity of Regional Cow, Goat and Ewe Milk Cheeses Produced in Poland and Antibiotic Resistance of Lactic Acid Bacteria Isolated from Them
Source: MDPI journal article supplement (doi:10.3390/ani13010168), 2022-12-31
Supplement: s1 [file s1]

**Table S1.** List of reference strains used in this study.

| Strain                                                   | Reference Number     | Application                                                                                    |
|----------------------------------------------------------|----------------------|------------------------------------------------------------------------------------------------|
| <i>Lactobacillus acidophilus</i>                         | DSM 9126; DSM 20079  | DGGE marker, positive control for PCR identification                                           |
| <i>Lactobacillus amylovorus</i>                          | DSM 20531            | DGGE marker, positive control for PCR identification                                           |
| <i>Levilactobacillus brevis</i>                          | DSM 1267; DSM 20054  | DGGE marker, positive control for PCR identification                                           |
| <i>Levilactobacillus brevis</i>                          | ATCC 367             | DGGE marker, positive control for PCR identification; positive control for <i>cat</i> -TC gene |
| <i>Lacticaseibacillus casei</i>                          | ATCC 334; DSM 20011  | DGGE marker, positive control for PCR identification                                           |
| <i>Lactobacillus delbrueckii</i> ssp. <i>bulgaricus</i>  | DSM 20080; DSM 20081 | DGGE marker, positive control for PCR identification                                           |
| <i>Lactobacillus delbrueckii</i> ssp. <i>delbrueckii</i> | DSM 20074            | DGGE marker, positive control for PCR identification                                           |
| <i>Lactobacillus delbrueckii</i> ssp. <i>lactis</i>      | DSM 20072            | DGGE marker, positive control for PCR identification                                           |
| <i>Limosilactobacillus fermentum</i>                     | DSM 20052; DSM 20391 | DGGE marker, positive control for PCR identification                                           |
| <i>Lactobacillus gasseri</i>                             | ATCC 19992           | DGGE marker, positive control for PCR identification                                           |
| <i>Lactobacillus helveticus</i>                          | DSM 20075            | DGGE marker, positive control for PCR identification                                           |
| <i>Lentilactobacillus hilgardii</i>                      | DSM 20176            | DGGE marker, positive control for PCR identification                                           |
| <i>Lacticaseibacillus paracasei</i>                      | DSM 2649; DSM 5622   | DGGE marker, positive control for PCR identification                                           |
| <i>Lactiplantibacillus paraplantarum</i>                 | DSM 10667            | DGGE marker, positive control for PCR identification                                           |
| <i>Lactiplantibacillus pentosus</i>                      | DSM 20314            | DGGE marker, positive control for PCR identification                                           |
| <i>Lactiplantibacillus plantarum</i>                     | ATCC 8014; DSM 20174 | DGGE marker, positive control for PCR identification                                           |
| <i>Lacticaseibacillus rhamnosus</i>                      | ATCC 7469; ATCC 9595 | DGGE marker, positive control for PCR identification                                           |
| <i>Limosilactobacillus reuteri</i>                       | ATCC 55730           | DGGE marker; positive control for <i>tetW</i>                                                  |
| <i>Lactococcus plantarum</i>                             | DSM 20686; DSM 20687 | DGGE marker, positive control for PCR identification                                           |
| <i>Lactococcus lactis</i> ssp. <i>cremoris</i>           | DSM 4367; DSM 20069  | DGGE marker, positive control for PCR identification                                           |
| <i>Lactococcus lactis</i> ssp. <i>lactis</i>             | DSM 4366; DSM 20481  | DGGE marker, positive control for PCR identification                                           |
| <i>Lactococcus raffinolactis</i>                         | DSM 20443            | DGGE marker                                                                                    |
| <i>Leuconostoc lactis</i>                                | DSM 8581             | DGGE marker, positive control for PCR identification                                           |

|                                                                    |                       |                                                                                                             |
|--------------------------------------------------------------------|-----------------------|-------------------------------------------------------------------------------------------------------------|
| <i>Leuconostoc mesenteroides</i> ssp. <i>cremoris</i>              | DSM 20200; DSM 20346  | DGGE marker, positive control for PCR identification                                                        |
| <i>Leuconostoc mesenteroides</i> ssp. <i>dextranicum</i>           | DSM 20484             | DGGE marker                                                                                                 |
| <i>Leuconostoc mesenteroides</i> ssp. <i>mesenteroides</i>         | DSM 20240; DSM 20343  | DGGE marker, positive control for PCR identification                                                        |
| <i>Leuconostoc pseudomesenteroides</i>                             | DSM 5624; DSM 20193   | DGGE marker                                                                                                 |
| <i>Streptococcus thermophilus</i>                                  | ATCC 19258            | DGGE marker                                                                                                 |
| <i>Propionibacterium acidipropionici</i>                           | DSM 4900              | DGGE marker                                                                                                 |
| <i>Propionibacterium freudenreichii</i> ssp. <i>freudenreichii</i> | DSM 20271             | DGGE marker                                                                                                 |
| <i>Propionibacterium freudenreichii</i> ssp. <i>shermanii</i>      | DSM 4902              | DGGE marker                                                                                                 |
| <i>Propionibacterium jensenii</i>                                  | DSM 20535             | DGGE marker                                                                                                 |
| <i>Propionibacterium thoenii</i>                                   | DSM 20276             | DGGE marker                                                                                                 |
| <i>Citrobacter freundii</i>                                        | ATCC 8090             | DGGE marker                                                                                                 |
| <i>Enterobacter aerogenes</i>                                      | ATCC 13048            | DGGE marker                                                                                                 |
| <i>Enterobacter cloacae</i>                                        | ATCC 13047            | DGGE marker                                                                                                 |
| <i>Escherichia coli</i>                                            | ATCC 8739; ATCC 11775 | DGGE marker                                                                                                 |
| <i>Escherichia coli</i>                                            | ATCC 25922            | DGGE marker, positive control for phenotypic antibiotic resistance                                          |
| <i>Enterococcus casseliflavus</i>                                  | ATCC 25788            | DGGE marker                                                                                                 |
| <i>Enterococcus durans</i>                                         | ATCC 6056             | DGGE marker                                                                                                 |
| <i>Enterococcus faecalis</i>                                       | ATCC 29212            | DGGE marker; positive control for PCR identification; positive control for phenotypic antibiotic resistance |
| <i>Enterococcus faecalis</i>                                       | ATCC 51299            | DGGE marker, positive control for PCR identification                                                        |
| <i>Enterococcus faecalis</i>                                       | 16632EK               | Positive control for <i>tetW</i> gene                                                                       |
| <i>Enterococcus faecium</i>                                        | ATCC 775              | DGGE marker, positive control for PCR identification                                                        |
| <i>Enterococcus faecium</i>                                        | ATCC 7171             | DGGE marker, positive control for PCR identification                                                        |
| <i>Enterococcus faecium</i>                                        | 15555EK               | Positive control for <i>tetL</i> , <i>tetM</i> , <i>ermB</i> genes                                          |
| <i>Enterococcus gallinarum</i>                                     | ATCC 49573            | DGGE marker                                                                                                 |
| <i>Enterococcus hire</i>                                           | ATCC 8043             | DGGE marker                                                                                                 |
| <i>Listeria monocytogenes</i>                                      | ATCC BAA-751          | DGGE marker                                                                                                 |
| <i>Pseudomonas aeruginosa</i>                                      | ATCC 9027             | DGGE marker                                                                                                 |
| <i>Staphylococcus aureus</i>                                       | ATCC 43300            | DGGE marker                                                                                                 |
| <i>Staphylococcus aureus</i>                                       | ATCC 25923            | DGGE marker; positive control for phenotypic antibiotic resistance                                          |
| <i>Staphylococcus epidermidis</i>                                  | ATCC 49461            | DGGE marker                                                                                                 |
| <i>Staphylococcus saprophyticus</i>                                | ATCC 49453            | DGGE marker                                                                                                 |
| <i>Staphylococcus xylosus</i>                                      | ATCC 29971            | DGGE marker                                                                                                 |

|                                  |            |             |
|----------------------------------|------------|-------------|
| <i>Bacillus cereus</i>           | ATCC 14579 | DGGE marker |
| <i>Bacillus coagulans</i>        | ATCC 7050  | DGGE marker |
| <i>Bacillus subtilis</i>         | ATCC 6051  | DGGE marker |
| <i>Clostridium butyricum</i>     | ATCC 10702 | DGGE marker |
| <i>Clostridium perfringens</i>   | ATCC 13124 | DGGE marker |
| <i>Clostridium sporogenes</i>    | ATCC 3584  | DGGE marker |
| <i>Clostridium tyrobutyricum</i> | ATCC 2637  | DGGE marker |
